# Supplementary material for: A new functional membrane protein microarray based on tethered phospholipid bilayers
Source: Royal Society of Chemistry journal article supplement (doi:10.1039/c8an00260f), 2018-01-01
Supplement: c8an00260f1.pdf [file c8an00260f1.pdf]

## New functional membrane protein microarray based on tethered phospholipid bilayers

Meriem Chadli<sup>1,2</sup>, Ofelia Maniti<sup>1</sup>, Christophe Marquette<sup>1</sup>, Bruno Tillier<sup>2</sup>, Sandra Cortès<sup>2</sup>, Agnès Girard-Egrot<sup>1\*</sup>

### Supporting information

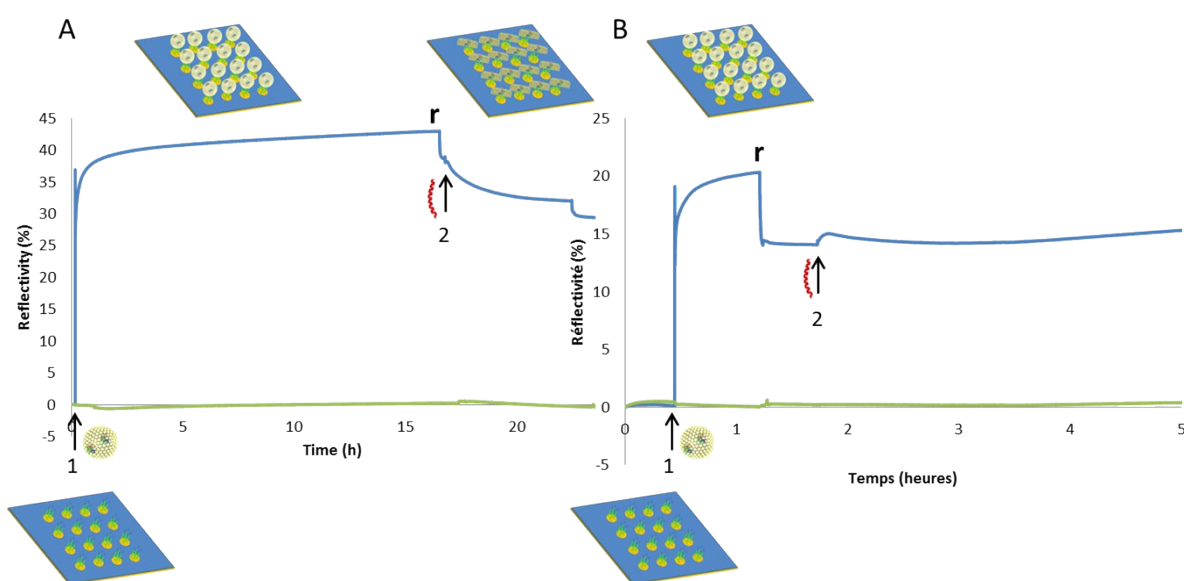

Figure S1. Negative controls for pep-tBLM microarray formation integrating CXCR4. (A) pep-tBLM microarray formation (see figure 1 and 3) using concomitant injection of CXCR4 cell-free expressed proteoliposomes and  $\text{NiCl}_2$  (arrow 1). After rinsing (r) and injection of fusogenic peptide (arrow 2), vesicle fusion occurred and pep-tBLMs were formed in microspots. (B) Control experiment for pep-tBLM formation using injection of CXCR4 cell-free expressed proteoliposomes without addition of  $\text{NiCl}_2$  (arrow 1). The reflectivity signal was two times lower than the one previously obtained in section A and after rinsing (r), an important decrease of reflectivity occurred; both of these events characterizing unspecific adsorption of proteoliposomes to peptide tethers. After fusogenic peptide injection (arrow 2), no fusion occurred indicating that the remaining amount of bound proteoliposomes was not enough to promote peptide action, thus confirming that without the presence of nickel ions in the medium, proteoliposomes did not bind specifically to peptide tethers and the density of lipids needed to achieve vesicle fusion was not reached.

<sup>1</sup>Univ Lyon, Université Lyon 1, Institut de Chimie et Biochimie Moléculaires et Supramoléculaires, ICBMS, UMR CNRS 5246, 43 Bd du 11 Novembre 1918, 69622 VILLEURBANNE, France

<sup>2</sup> Syntheliss, Biopolis, 5, avenue du Grand Sablon, 38700 LA TRONCHE, France

\*Corresponding author: [agnes.girard-egrot@univ-lyon1.fr](mailto:agnes.girard-egrot@univ-lyon1.fr)
